# Supplementary material
Source: MDPI journal article supplement (https://www.mdpi.com/2073-4395/11/10/2060)
Supplement: s1 [file s1]

Table S1. Annual dry biomass yield in five consecutive growing seasons of the different perennial grasses tested.

| Species                          | Cycle | FB <sup>1</sup><br>(t/ha)        | DB <sup>2</sup><br>(t/ha)      |
|----------------------------------|-------|----------------------------------|--------------------------------|
| Control                          | 1     | -5,33E-15 ± 3,258 <sup>a,3</sup> | -5,55E-17 ± 1,603 <sup>a</sup> |
|                                  | 2     | 13,68 ± 3,258 <sup>b</sup>       | 3,21 ± 1,603 <sup>ab</sup>     |
|                                  | 3     | 10,04 ± 3,258 <sup>b</sup>       | 5,04 ± 1,603 <sup>b</sup>      |
|                                  | 4     | 5,03 ± 3,258 <sup>ab</sup>       | 2,61 ± 1,603 <sup>ab</sup>     |
|                                  | 5     | 4,24 ± 3,258 <sup>ab</sup>       | 3,88 ± 1,603 <sup>ab</sup>     |
| <i>Ampelodesmos mauritanicus</i> | 1     |                                  |                                |
|                                  | 2     | 13,99 ± 3,258 <sup>a</sup>       | 6,50 ± 1,603 <sup>a</sup>      |
|                                  | 3     | 12,56 ± 3,258 <sup>a</sup>       | 6,64 ± 1,603 <sup>a</sup>      |
|                                  | 4     | 26,55 ± 3,258 <sup>b</sup>       | 13,13 ± 1,603 <sup>b</sup>     |
|                                  | 5     | 12,25 ± 3,258 <sup>a</sup>       | 5,88 ± 1,603 <sup>a</sup>      |
| <i>Arundo donax</i>              | 1     |                                  |                                |
|                                  | 2     | 18,83 ± 3,258 <sup>a</sup>       | 11,55 ± 1,603 <sup>a</sup>     |
|                                  | 3     | 39,13 ± 3,258 <sup>b</sup>       | 21,09 ± 1,603 <sup>b</sup>     |
|                                  | 4     | 57,98 ± 3,258 <sup>c</sup>       | 32,65 ± 1,603 <sup>c</sup>     |
|                                  | 5     | 64,50 ± 3,258 <sup>c</sup>       | 33,09 ± 1,603 <sup>c</sup>     |
| <i>Dactylis glomerata</i>        | 1     | 2,63 ± 1,881 <sup>a</sup>        | 2,15 ± 0,926 <sup>a</sup>      |
|                                  | 2     | 15,17 ± 1,881 <sup>b</sup>       | 6,65 ± 0,926 <sup>b</sup>      |
|                                  | 3     | 34,66 ± 1,881 <sup>c</sup>       | 12,66 ± 0,926 <sup>c</sup>     |
|                                  | 4     | 9,60 ± 1,881 <sup>b</sup>        | 5,22 ± 0,926 <sup>b</sup>      |
|                                  | 5     | 5,29 ± 1,881 <sup>ab</sup>       | 4,56 ± 0,926 <sup>ab</sup>     |
| <i>Festuca arundinacea</i>       | 1     | 1,13 ± 3,258 <sup>a</sup>        | 0,69 ± 1,603 <sup>a</sup>      |
|                                  | 2     | 29,42 ± 3,258 <sup>c</sup>       | 10,22 ± 1,603 <sup>b</sup>     |
|                                  | 3     | 30,83 ± 3,258 <sup>c</sup>       | 7,68 ± 1,603 <sup>b</sup>      |
|                                  | 4     | 15,27 ± 3,258 <sup>b</sup>       | 8,12 ± 1,603 <sup>b</sup>      |
|                                  | 5     | 6,56 ± 3,258 <sup>a</sup>        | 5,12 ± 1,603 <sup>ab</sup>     |
| <i>Piptatherum miliaceum</i>     | 1     | 8,88 ± 2,304 <sup>a</sup>        | 5,30 ± 1,134 <sup>a</sup>      |
|                                  | 2     | 24,19 ± 2,304 <sup>b</sup>       | 11,18 ± 1,134 <sup>b</sup>     |
|                                  | 3     | 36,46 ± 2,304 <sup>c</sup>       | 13,86 ± 1,134 <sup>b</sup>     |
|                                  | 4     | 14,67 ± 2,304 <sup>ab</sup>      | 6,92 ± 1,134 <sup>a</sup>      |
|                                  | 5     | 6,37 ± 2,304 <sup>a</sup>        | 4,85 ± 1,134 <sup>a</sup>      |
| <i>Panicum virgatum</i>          | 1     |                                  |                                |
|                                  | 2     | 10,79 ± 3,258 <sup>a</sup>       | 5,36 ± 1,603 <sup>a</sup>      |
|                                  | 3     | 17,17 ± 3,258 <sup>a</sup>       | 9,73 ± 1,603 <sup>ab</sup>     |
|                                  | 4     | 27,95 ± 3,258 <sup>b</sup>       | 15,10 ± 1,603 <sup>b</sup>     |
|                                  | 5     | 10,68 ± 3,258 <sup>a</sup>       | 4,88 ± 1,603 <sup>a</sup>      |
| R <sup>2</sup>                   |       | 0,852                            | 0,839                          |
| P (Species)                      |       | 0,000                            | 0,000                          |

|                     |       |       |
|---------------------|-------|-------|
| P (Cycle)           | 0,000 | 0,000 |
| P (Species × Cycle) | 0,000 | 0,000 |

<sup>1</sup> FB = fresh biomass

<sup>2</sup> DB = dry biomass

<sup>3</sup> Mean ± Standard Error of 4 replicates

Different letters indicate significant differences between species or growing cycle.

Table S2. Bromatology analysis of the different perennial grasses assayed in the second cut (2014).

| Species                          | <sup>1</sup> DB            | <sup>2</sup> A            | <sup>3</sup> CF             | <sup>4</sup> ADF            | <sup>5</sup> NDF           | <sup>6</sup> P            | Cellulose                   | Hemicellulose              | Lignin                     |
|----------------------------------|----------------------------|---------------------------|-----------------------------|-----------------------------|----------------------------|---------------------------|-----------------------------|----------------------------|----------------------------|
| <i>Ampelodesmos mauritanicus</i> | 93,68 ± 0,250 <sup>c</sup> | 6,60 ± 0,156 <sup>c</sup> | 37,84 ± 0,497 <sup>c</sup>  | 44,61 ± 0,507 <sup>c</sup>  | 72,90 ± 0,466 <sup>c</sup> | 7,85 ± 0,275 <sup>d</sup> | 39,31 ± 0,383 <sup>c</sup>  | 28,28 ± 0,587 <sup>d</sup> | 5,30 ± 0,321 <sup>b</sup>  |
| <i>Arundo donax</i>              | 93,97 ± 0,250 <sup>c</sup> | 6,15 ± 0,156 <sup>b</sup> | 46,00 ± 0,497 <sup>d</sup>  | 54,24 ± 0,507 <sup>d</sup>  | 75,13 ± 0,466 <sup>d</sup> | 3,44 ± 0,275 <sup>b</sup> | 44,46 ± 0,383 <sup>d</sup>  | 20,88 ± 0,587 <sup>a</sup> | 9,79 ± 0,321 <sup>c</sup>  |
| <i>Dactylis glomerata</i>        | 88,65 ± 0,144 <sup>b</sup> | 8,89 ± 0,090 <sup>c</sup> | 34,42 ± 0,287 <sup>ab</sup> | 42,57 ± 0,292 <sup>b</sup>  | 63,89 ± 0,269 <sup>a</sup> | 7,64 ± 0,159 <sup>d</sup> | 36,76 ± 0,221 <sup>ab</sup> | 21,31 ± 0,339 <sup>b</sup> | 5,81 ± 0,185 <sup>bc</sup> |
| <i>Festuca arundinacea</i>       | 87,12 ± 0,250 <sup>a</sup> | 9,16 ± 0,156 <sup>c</sup> | 33,12 ± 0,497 <sup>a</sup>  | 40,91 ± 0,507 <sup>a</sup>  | 64,21 ± 0,466 <sup>a</sup> | 5,21 ± 0,275 <sup>c</sup> | 37,59 ± 0,383 <sup>b</sup>  | 23,30 ± 0,587 <sup>c</sup> | 3,32 ± 0,321 <sup>a</sup>  |
| <i>Piptatherum miliaceum</i>     | 87,71 ± 0,177 <sup>a</sup> | 7,16 ± 0,110 <sup>d</sup> | 35,56 ± 0,351 <sup>b</sup>  | 42,16 ± 0,358 <sup>ab</sup> | 70,28 ± 0,329 <sup>b</sup> | 7,49 ± 0,195 <sup>d</sup> | 35,78 ± 0,271 <sup>a</sup>  | 28,12 ± 0,415 <sup>d</sup> | 6,39 ± 0,227 <sup>c</sup>  |
| <i>Panicum virgatum</i>          | 94,01 ± 0,250 <sup>c</sup> | 4,96 ± 0,156 <sup>a</sup> | 46,83 ± 0,497 <sup>d</sup>  | 55,89 ± 0,507 <sup>c</sup>  | 84,78 ± 0,466 <sup>c</sup> | 1,88 ± 0,275 <sup>a</sup> | 47,44 ± 0,383 <sup>c</sup>  | 28,89 ± 0,587 <sup>d</sup> | 8,46 ± 0,321 <sup>d</sup>  |
| R <sup>2</sup>                   | 0,979                      | 0,969                     | 0,961                       | 0,966                       | 0,981                      | 0,936                     | 0,964                       | 0,897                      | 0,880                      |
| P (Species)                      | 0,000                      | 0,000                     | 0,000                       | 0,000                       | 0,000                      | 0,000                     | 0,000                       | 0,000                      | 0,000                      |
| P (Block)                        | 0,484                      | 0,264                     | 0,813                       | 0,328                       | 0,003                      | 0,864                     | 0,221                       | 0,892                      | 0,221                      |

(<sup>1</sup>DB: dry biomass; <sup>2</sup>A: ash; <sup>3</sup>TF: total fiber; <sup>4</sup>ADF: acid detergent fiber; <sup>5</sup>NDF: neutral detergent fiber; <sup>6</sup>P: protein).

Different letters indicate significant differences between species or growing cycle.

Table S3. Bromatology analysis of the different perennial grasses assayed in the second cut (2017).

| Species                          | <sup>1</sup> DB             | <sup>2</sup> A            | <sup>3</sup> CF            | <sup>4</sup> ADF           | <sup>5</sup> NDF           | <sup>6</sup> P            | Cellulose                   | Hemicellulose               | Lignin                     |
|----------------------------------|-----------------------------|---------------------------|----------------------------|----------------------------|----------------------------|---------------------------|-----------------------------|-----------------------------|----------------------------|
| Control                          | 92,03 ± 0,132 <sup>ab</sup> | 8,76 ± 0,067 <sup>c</sup> | 40,89 ± 0,618 <sup>b</sup> | 48,51 ± 0,498 <sup>b</sup> | 65,49 ± 0,514 <sup>a</sup> | 5,40 ± 0,093 <sup>d</sup> | 43,36 ± 0,482 <sup>d</sup>  | 16,14 ± 0,783 <sup>a</sup>  | 5,98 ± 0,256 <sup>a</sup>  |
| <i>Ampelodesmos mauritanicus</i> | 93,16 ± 0,132 <sup>c</sup>  | 4,91 ± 0,067 <sup>b</sup> | 41,39 ± 0,618 <sup>c</sup> | 48,95 ± 0,498 <sup>b</sup> | 76,73 ± 0,514 <sup>c</sup> | 8,31 ± 0,093 <sup>g</sup> | 41,65 ± 0,482 <sup>c</sup>  | 28,22 ± 0,783 <sup>de</sup> | 6,86 ± 0,256 <sup>b</sup>  |
| <i>Arundo donax</i>              | 93,58 ± 0,132 <sup>d</sup>  | 6,27 ± 0,067 <sup>b</sup> | 37,40 ± 0,618 <sup>c</sup> | 49,34 ± 0,498 <sup>b</sup> | 70,68 ± 0,514 <sup>b</sup> | 5,84 ± 0,093 <sup>c</sup> | 40,31 ± 0,482 <sup>b</sup>  | 21,73 ± 0,783 <sup>b</sup>  | 8,63 ± 0,256 <sup>c</sup>  |
| <i>Dactylis glomerata</i>        | 93,19 ± 0,076 <sup>c</sup>  | 5,04 ± 0,039 <sup>b</sup> | 40,93 ± 0,357 <sup>c</sup> | 48,82 ± 0,288 <sup>b</sup> | 74,78 ± 0,297 <sup>d</sup> | 4,57 ± 0,054 <sup>c</sup> | 42,64 ± 0,282 <sup>cd</sup> | 25,96 ± 0,452 <sup>c</sup>  | 6,18 ± 0,148 <sup>ab</sup> |
| <i>Festuca arundinacea</i>       | 92,32 ± 0,132 <sup>b</sup>  | 5,56 ± 0,067 <sup>c</sup> | 41,74 ± 0,618 <sup>c</sup> | 50,70 ± 0,498 <sup>c</sup> | 76,26 ± 0,514 <sup>c</sup> | 2,05 ± 0,093 <sup>a</sup> | 45,08 ± 0,482 <sup>c</sup>  | 25,56 ± 0,783 <sup>c</sup>  | 5,63 ± 0,256 <sup>a</sup>  |
| <i>Piptatherum miliaceum</i>     | 93,03 ± 0,094 <sup>c</sup>  | 4,09 ± 0,047 <sup>a</sup> | 42,17 ± 0,437 <sup>c</sup> | 51,04 ± 0,352 <sup>c</sup> | 78,28 ± 0,364 <sup>f</sup> | 3,86 ± 0,066 <sup>b</sup> | 40,14 ± 0,341 <sup>b</sup>  | 27,18 ± 0,554 <sup>cd</sup> | 10,90 ± 0,181 <sup>d</sup> |
| <i>Panicum virgatum</i>          | 91,91 ± 0,132 <sup>a</sup>  | 5,45 ± 0,067 <sup>c</sup> | 35,69 ± 618 <sup>a</sup>   | 43,80 ± 0,498 <sup>a</sup> | 73,40 ± 0,514 <sup>c</sup> | 4,16 ± 0,093 <sup>f</sup> | 37,65 ± 0,482 <sup>a</sup>  | 29,60 ± 0,783 <sup>c</sup>  | 6,15 ± 0,256 <sup>ab</sup> |
| R <sup>2</sup>                   | 0,807                       | 0,969                     | 0,728                      | 0,812                      | 0,934                      | 0,987                     | 0,940                       | 0,842                       | 0,814                      |
| P (Species)                      | 0,000                       | 0,991                     | 0,000                      | 0,000                      | 0,000                      | 0,000                     | 0,000                       | 0,000                       | 0,000                      |
| P (Block)                        | 0,027                       | 0,000                     | 0,912                      | 0,142                      | 0,026                      | 0,029                     | 0,378                       | 0,564                       | 0,223                      |

(<sup>1</sup>DB: dry biomass; <sup>2</sup>A: ash; <sup>3</sup>TF: total fiber; <sup>4</sup>ADF: acid detergent fiber; <sup>5</sup>NDF: neutral detergent fiber; <sup>6</sup>P: protein).

Different letters indicate significant differences between species or growing cy
